# Supplementary material
Source: PubMed Central journal article supplement (PMC2718267)
Supplement: mmc1.pdf [file mmc1.pdf]

Biophysical Journal, Volume 96

**Supporting Material**

**Bovine Insulin Filaments Induced by Reducing Disulfide Bonds Show a Different Morphology, Secondary Structure and Cell Toxicity from Intact Insulin Amyloid Fibrils**

Tamotsu Zako, Masafumi Sakono, Naomi Hashimoto, Masaki Ihara, and Mizuo Maeda

**TABLE S1 Secondary structure elements from FTIR analysis of native insulin, insulin fibrils and filaments**

The wavenumbers of the constituent secondary structure element and the percent component areas (%) are shown. Band components were obtained from curve fitting. Percent component areas (%) are calculated considering the total area as 100%. Standard errors for well-defined components introduce an uncertainty of 10 -20% in the area measurement. The morphologies (fibrils or filaments) of the samples are determined from TEM observation (Fig.2).

|                            | $\beta$ -sheet<br>Extended chain |             | $\beta$ -sheet<br>Side chain |             | $\alpha$ -helix              |             | Disordered<br>Turn           |             |                              |             | Anti-parallel<br>$\beta$ -sheet |             |
|----------------------------|----------------------------------|-------------|------------------------------|-------------|------------------------------|-------------|------------------------------|-------------|------------------------------|-------------|---------------------------------|-------------|
|                            | Peak<br>( $\text{cm}^{-1}$ )     | Area<br>(%) | Peak<br>( $\text{cm}^{-1}$ ) | Area<br>(%) | Peak<br>( $\text{cm}^{-1}$ ) | Area<br>(%) | Peak<br>( $\text{cm}^{-1}$ ) | Area<br>(%) | Peak<br>( $\text{cm}^{-1}$ ) | Area<br>(%) | Peak<br>( $\text{cm}^{-1}$ )    | Area<br>(%) |
| Native insulin             | 1608                             | 6           | 1628                         | 28          | 1646                         | 45          | 1666                         | 21          | 1681                         | 1           |                                 |             |
| Insulin - TCEP (fibrils)   | 1602                             | 8           | 1623                         | 62          | 1642                         | 17          | 1663                         | 13          |                              |             |                                 |             |
| Insulin + TCEP (filaments) | 1600                             | 3           | 1619                         | 58          | 1644                         | 26          | 1668                         | 11          |                              |             | 1693                            | 2           |

**TABLE S2 Secondary structure elements from Raman spectroscopy analysis of insulin fibrils and filaments**

The wavenumbers of the constituent secondary structure element and the percent component areas (%) are shown. Band components were obtained from curve fitting. Percent component areas (%) are calculated considering the total area as 100%. Standard errors for well-defined components introduce an uncertainty of 10-20% in the area measurement. The morphologies (fibrils or filaments) of the samples are determined from TEM observation (Fig.2).

|                            | $\alpha$ -helix              |             | Organized $\beta$ -sheet     |             | Loose $\beta$ -strand<br>Disordered |             |                              |             |
|----------------------------|------------------------------|-------------|------------------------------|-------------|-------------------------------------|-------------|------------------------------|-------------|
|                            | Peak<br>( $\text{cm}^{-1}$ ) | Area<br>(%) | Peak<br>( $\text{cm}^{-1}$ ) | Area<br>(%) | Peak<br>( $\text{cm}^{-1}$ )        | Area<br>(%) | Peak<br>( $\text{cm}^{-1}$ ) | Area<br>(%) |
| Insulin - TCEP (fibrils)   | 1659                         | 15          | 1675                         | 55          | 1625                                | 18          | 1691                         | 12          |
| Insulin + TCEP (filaments) | 1660                         | 22          | 1674                         | 40          | 1630                                | 19          | 1689                         | 19          |
